# Supplementary material for: Characteristic and Chondrogenic Differentiation Analysis of Hybrid Hydrogels Comprised of Hyaluronic Acid Methacryloyl (HAMA), Gelatin Methacryloyl (GelMA), and the Acrylate-Functionalized Nano-Silica Crosslinker
Source: MDPI journal article supplement (doi:10.3390/polym14102003), 2022-05-13
Supplement: s1 [file s1]

## Supporting Information

### **Characteristic and chondrogenic differentiation analysis of hybrid hydrogels comprise of hyaluronic acid methacryloyl (HAMA), gelatin methacryloyl (GelMA), and the acrylate functionalized nano-silica crosslinker**

Swathi Nedunchezian<sup>1,2,3</sup>, Che-Wei Wu<sup>2,3</sup>, Shung-Cheng Wu<sup>2,3</sup>, Chung-Hwan Chen<sup>2,3,4</sup>, Je-Ken Chang<sup>2,3,4</sup>,  
Chih-Kuang Wang<sup>1,2,3,5,\*</sup>

<sup>1</sup>Department of Medicinal and applied Chemistry, Kaohsiung Medical University, Kaohsiung, Taiwan.

<sup>2</sup>Regenerative Medicine and Cell Therapy Research Center, Kaohsiung Medical University, Kaohsiung, Taiwan.

<sup>3</sup>Orthopedic Research Center, College of Medicine, Kaohsiung Medical University, Kaohsiung, Taiwan.

<sup>4</sup>Department of Orthopedics, College of Medicine, Kaohsiung Medical University, Kaohsiung, Taiwan.

<sup>5</sup>Graduate Institute of Medicine, Kaohsiung Medical University, Kaohsiung, Taiwan

\* Corresponding author: Chih-Kuang Wang

E-mail address: ckwang@kmu.edu.tw (C.K. Wang)

Tel.: 886-7-3121101 ext. 2677; Fax: 886-7-3125339

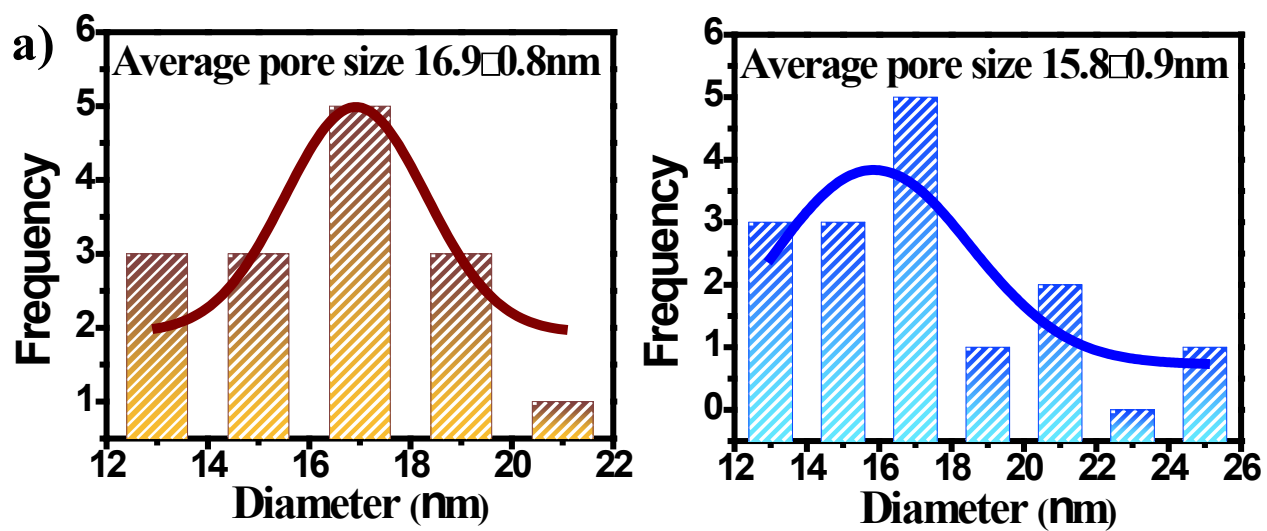

**Figure S1** Particle size distribution of nano-silica (nSi) (a) and AFnSi crossliner (b).

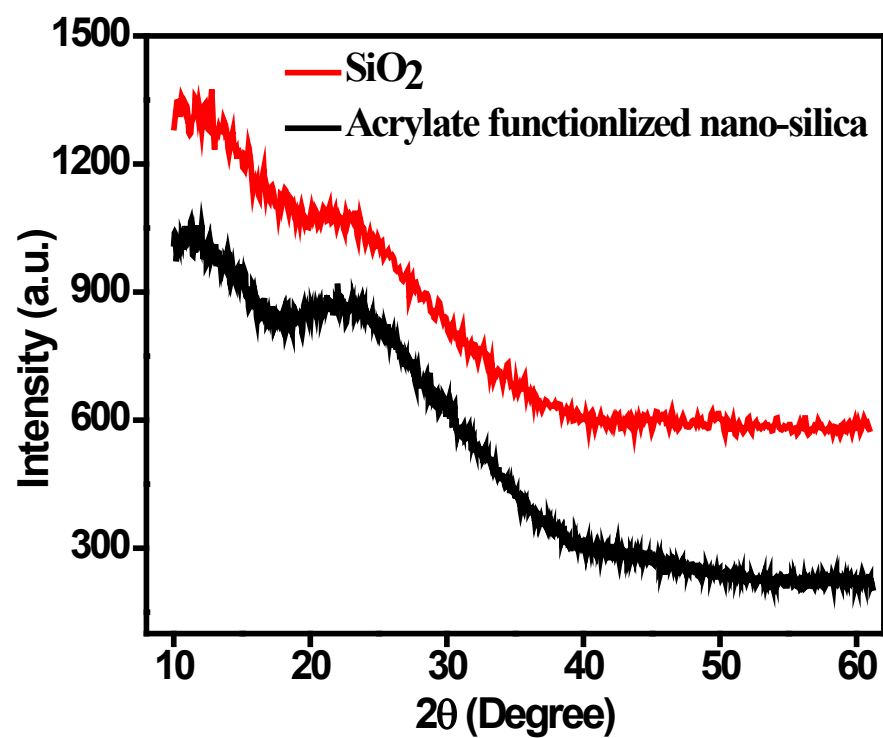

**Figure S2** Demonstrates the XRD pattern of nano-silica (SiO<sub>2</sub>) (red line) and acrylate functionalised nano-silica (black line).

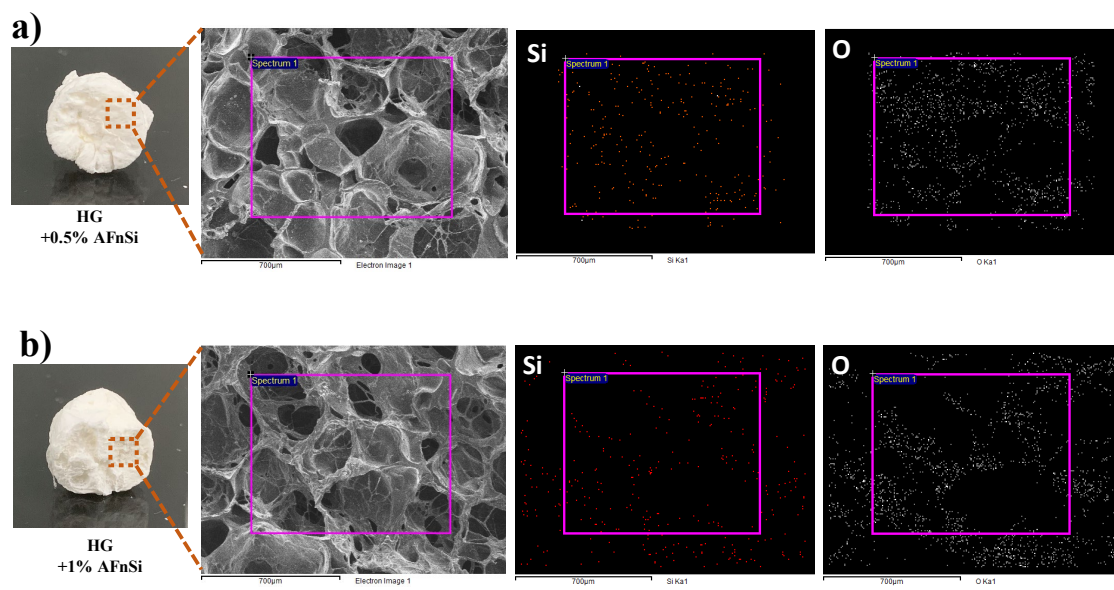

**Figure S3** Side-view optical micrograph, SEM and its elemental mapping analysis of EDS image of the hybrid hydrogel HG with 0.5% AFnSi (a) and HG with 1% AFnSi crosslinker (b).

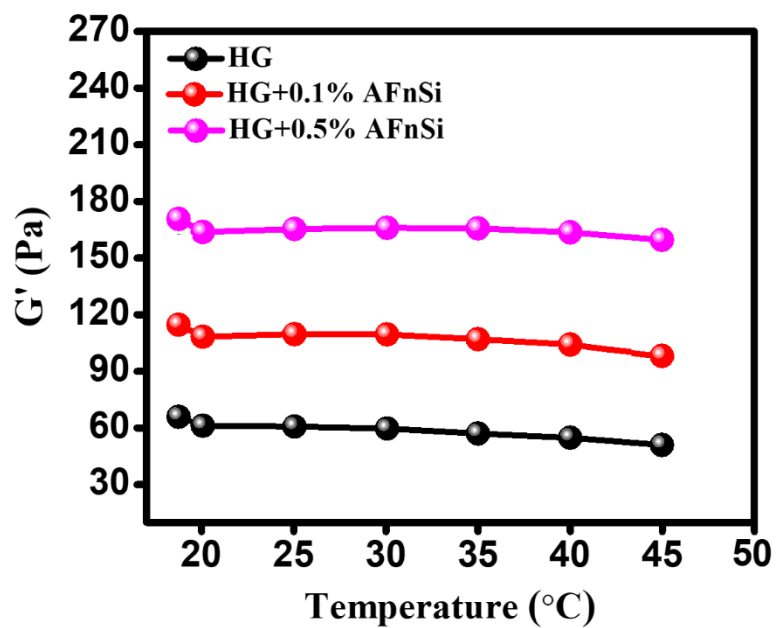

**Figure S4** Storage modulus ( $G'$ ) as a function of the temperature sweep for the photo-crosslinked HG hydrogel with different concentrations of AFnSi crosslinkers such as 0, 0.1, and 0.5% (w/v) respectively.
